# Supplementary material for: Whole Transcriptome Analysis of Acinetobacter baumannii Assessed by RNA-Sequencing Reveals Different mRNA Expression Profiles in Biofilm Compared to Planktonic Cells
Source: PLoS One. 2013 Aug 30;8(8):e72968. doi: 10.1371/journal.pone.0072968 (PMC3758355; doi:10.1371/journal.pone.0072968)
Supplement: Table S5 — The expression levels of genes up-regulated in biofilm-associated vs. stationary phase cells. The data were filtered based on p < 0.001. Id: name or code of the region of interest; baseMean: mean of the two next columns; baseMeanA: normalized number of counts for sample A; baseMeanB: normalized number of counts for sample B; Fold-change: baseMeanB/baseMeanA; log2Fold-change: log2 baseMeanB/baseMeanA; pval: p value; padj: p value adjusted for multiple testing; resVarA: variance of A; resVarB: variance of B.A: stationary phase cells. B: biofilm-associated cells. (XLSX) [file pone.0072968.s008.xlsx]

## Sheet: Table S5 EstaTOBiof-UP
id	baseMean	baseMeanA	baseMeanB	foldChange	log2FoldChange	pval	padj	resVarA	resVarB
1:atpC:unknown_transcript_1	305.709	110.414	501.004	4.53749	2.18189	2.80658e-06	0.000178757	0.212419	0.00554163
1:rplP:unknown_transcript_1	523.099	229.313	816.886	3.56233	1.83282	2.52902e-07	2.09403e-05	0.979709	0.396919
1:tsf:unknown_transcript_1	413.284	140.272	686.295	4.8926	2.2906	2.44713e-07	2.07818e-05	0.0265452	4.74536
A1S_0087	207.87	56.3852	359.355	6.3732	2.67202	4.88472e-06	0.000283828	0.0221423	2.7222
A1S_0112	325.35	12.0178	638.683	53.1447	5.73186	1.49772e-23	7.08635e-21	0.0199149	0.024324
A1S_0113	368.79	16.7978	720.783	42.9094	5.42322	5.30594e-24	2.92888e-21	0.00196106	2.15015
A1S_0114	63.9799	0	127.96	Inf	Inf	4.48354e-06	0.00026999	0	1.40264
A1S_0115	1090.91	65.9621	2115.86	32.0769	5.00346	2.20137e-47	3.64547e-44	0.00014954	0.918161
A1S_0116	967.428	23.9847	1910.87	79.6705	6.31597	1.68917e-55	5.59453e-52	6.31527e-07	0.243751
A1S_0151	435.851	150.976	720.726	4.77377	2.25513	6.45668e-07	4.86012e-05	0.293458	4.3609
A1S_0153	1405.26	592.312	2218.21	3.74501	1.90497	6.09138e-11	9.60698e-09	0.0388679	0.0377656
A1S_0154	708.932	245.89	1171.97	4.76626	2.25286	1.17256e-10	1.76523e-08	0.0243317	2.8685
A1S_0155	1333.81	480.787	2186.83	4.54844	2.18537	1.18988e-13	3.03145e-11	0.0402205	0.0906583
A1S_0279	3015.58	1478.52	4552.65	3.0792	1.62256	3.52859e-11	5.84334e-09	0.0165588	2.22803
A1S_0285	297.851	86.1582	509.543	5.91404	2.56414	7.22243e-06	0.000385818	1.04415	0.0606122
A1S_0869	3087.79	1756.65	4418.92	2.51553	1.33087	9.25323e-08	8.7562e-06	0.0439176	1.43906
A1S_0884	900.853	336.896	1464.81	4.34796	2.12034	2.42694e-10	3.34918e-08	0.0504319	2.79358
A1S_1266	162.051	25.1627	298.94	11.8803	3.5705	8.02502e-07	5.90641e-05	0.027945	0.0800612
A1S_1637	422.249	137.916	706.582	5.12327	2.35707	4.14997e-08	4.16506e-06	0.000697067	1.53014
A1S_2098	157.47	2.38998	312.549	130.775	7.03094	6.52823e-13	1.27185e-10	0.00505303	0.0475965
A1S_2102	177.953	37.2654	318.64	8.55057	3.09602	1.54481e-07	1.34642e-05	0.451535	0.0130867
A1S_2218	561.016	0	1122.03	Inf	Inf	4.27538e-47	4.72002e-44	0	5.45742
A1S_2718	518.146	119.822	916.47	7.64862	2.9352	2.00067e-12	3.68123e-10	0.156784	0.201231
A1S_2719	526.458	155.773	897.143	5.75929	2.52589	1.22211e-09	1.49912e-07	0.234124	2.3381
A1S_2753	494.106	226.804	761.408	3.35712	1.74723	3.64752e-06	0.000223715	0.350198	2.4237
A1S_3056	728.897	361.118	1096.68	3.03689	1.60259	1.86926e-06	0.000126347	0.21182	1.06376
A1S_3064	831.32	366.601	1296.04	3.53529	1.82183	1.28354e-06	8.8564e-05	0.996728	8.77034
A1S_3075	1029.89	507.094	1552.68	3.06192	1.61444	9.81749e-07	7.0686e-05	0.174198	0.00451707
A1S_3134	768.298	364.72	1171.88	3.21309	1.68396	3.35605e-07	2.71104e-05	0.209666	0.857994
A1S_3297	618.625	257.772	979.477	3.79978	1.92592	3.92506e-07	3.09519e-05	0.0421854	0.277784
A1S_3402	155.109	37.2484	272.97	7.32838	2.87349	6.845e-06	0.000377844	0.340241	1.53823
A1S_3404	391.131	151.129	631.133	4.17612	2.06216	2.67587e-06	0.000173774	0.0157389	2.38998
A1S_3405	790.73	320.234	1261.23	3.93845	1.97763	4.40284e-09	5.02835e-07	0.0148017	1.50447
A1S_3407	2575.6	1418.6	3732.6	2.63119	1.39572	3.74767e-08	3.87884e-06	0.00909933	0.117796
A1S_3414	261.771	23.9338	499.608	20.8746	4.38368	5.63341e-13	1.16612e-10	0.0983025	0.670009
