# Supplementary material for: Whole Transcriptome Analysis of Acinetobacter baumannii Assessed by RNA-Sequencing Reveals Different mRNA Expression Profiles in Biofilm Compared to Planktonic Cells
Source: PLoS One. 2013 Aug 30;8(8):e72968. doi: 10.1371/journal.pone.0072968 (PMC3758355; doi:10.1371/journal.pone.0072968)
Supplement: Table S7 — The expression levels of genes up-regulated in exponentially growing vs. stationary phase cells, filtered based on p < 0.001. Id: name or code of the region of interest; baseMean: mean of the two next columns; baseMeanA: normalized number of counts for sample A; baseMeanB: normalized number of counts for sample B; Fold-change: baseMeanB/baseMeanA; log2Fold-change: log2 baseMeanB/baseMeanA; pval: p value; padj: p value adjusted for multiple testing; resVarA: variance of A; resVarB: variance of B.A: stationary phase cells. B: exponential phase cells. (XLSX) [file pone.0072968.s010.xlsx]

## Sheet: Table S7 EstaTOExpo-UP
id	baseMean	baseMeanA	baseMeanB	foldChange	log2FoldChange	pval	padj	resVarA	resVarB
1:atpC:unknown_transcript_1	303.686	110.414	496.958	4.50084	2.1702	2.09311e-07	7.31254e-06	0.213879	0.24435
1:groES:unknown_transcript_1	181.379	47.9694	314.789	6.56229	2.7142	2.24744e-06	6.41792e-05	1.93838e-05	0.00108823
A1S_0153	1280.07	592.312	1967.82	3.32227	1.73217	1.11483e-10	5.90499e-09	0.0440402	0.0276783
A1S_0154	478.76	245.89	711.631	2.8941	1.53312	1.43325e-05	0.000336276	0.0386737	0.266275
A1S_0155	1270.78	480.787	2060.77	4.28624	2.09971	1.2004e-14	1.0108e-12	0.0429452	1.55011
A1S_0159	69.5095	4.77997	134.239	28.0837	4.81166	4.80245e-05	0.000973533	0.0479898	0.0196956
A1S_0279	2668.5	1478.52	3858.49	2.6097	1.38388	4.65144e-10	2.2799e-08	0.0199245	0.285124
A1S_0545	315.038	108.007	522.068	4.83363	2.27311	4.39402e-08	1.69764e-06	0.167742	0.812398
A1S_0748	240.473	64.5975	416.349	6.44529	2.68825	1.85028e-06	5.33009e-05	1.00738	0.263366
A1S_0757	1157.14	732.872	1581.41	2.15782	1.10958	2.03733e-05	0.000448356	0.102496	0.860878
A1S_0763	598.587	339.744	857.43	2.52375	1.33557	4.84906e-06	0.000128422	1.53236	5.36679e-05
A1S_0820	199.826	31.1546	368.497	11.828	3.56413	1.92801e-09	8.91772e-08	0.031855	1.08948
A1S_0869	2693.15	1756.65	3629.65	2.06623	1.047	2.94069e-06	8.25405e-05	0.0538917	0.305389
A1S_0884	1638.54	336.896	2940.18	8.72726	3.12553	1.03453e-32	2.26494e-30	0.0221241	4.70766
A1S_1205	433.109	157.07	709.148	4.51485	2.17468	1.71688e-08	7.32238e-07	0.0143838	0.17298
A1S_1266	149.133	25.1627	273.103	10.8535	3.44009	3.6576e-07	1.21764e-05	0.0304222	0.685941
A1S_1268	72.763	2.40695	143.119	59.4606	5.89386	6.86881e-07	2.12803e-05	0.0118002	1.51259
A1S_1270	188.852	4.77997	372.924	78.0181	6.28574	9.80052e-16	8.69862e-14	0.0164291	0.00475265
A1S_1528	568.913	172.622	965.205	5.59144	2.48322	2.93977e-12	1.97909e-10	0.0579601	1.21089
A1S_1530	316.231	139.128	493.333	3.54589	1.82615	1.71279e-05	0.000390612	0.00932308	0.00433447
A1S_1544	376.218	210.227	542.209	2.57916	1.3669	2.0829e-05	0.000452997	2.73574	0.867984
A1S_1637	380.844	137.916	623.771	4.52283	2.17722	5.67396e-08	2.14176e-06	0.0007817	0.0279717
A1S_1879	75.4597	5.97496	144.945	24.2587	4.60043	4.12588e-05	0.000846837	0.0682258	1.08009
A1S_2166	846.331	489.254	1203.41	2.45968	1.29847	1.57145e-05	0.000360884	0.00557842	0.0472675
A1S_2343	493.743	209.751	777.735	3.70789	1.8906	5.78939e-07	1.84586e-05	0.194009	0.436398
A1S_2628	343.046	149.832	536.26	3.57907	1.83959	1.88863e-05	0.000424812	0.11947	0.258398
A1S_2718	460.211	119.822	800.601	6.68161	2.7402	5.37752e-12	3.4627e-10	0.180965	0.0788778
A1S_2719	497.907	155.773	840.041	5.39272	2.43101	3.73764e-10	1.85976e-08	0.250282	11.195
A1S_2736	845.216	468.083	1222.35	2.61139	1.38482	2.90573e-07	9.94001e-06	1.09279	0.0014184
A1S_3134	646.914	364.72	929.107	2.54745	1.34906	1.23316e-05	0.000295599	0.257362	0.139171
A1S_3297	548.282	257.772	838.793	3.25401	1.70222	1.76492e-06	5.1292e-05	0.0486089	1.78597
A1S_3350	1178	713.532	1642.47	2.30188	1.20282	8.63395e-06	0.000211596	6.52197e-05	0.0619136
A1S_3449	339.5	149.883	529.117	3.5302	1.81975	1.52425e-05	0.000352509	0.00914913	0.103593
